# Supplementary material for: Performance analysis of AL amyloidosis cardiac biomarker staging systems with special focus on renal failure and atrial arrhythmia
Source: PubMed Central journal article supplement — Haematologica. 2019 Jan 17;104(7):1451–9. doi: 10.3324/haematol.2018.205336 (PMC6601086; doi:10.3324/haematol.2018.205336), 2019-07
Supplement: 2018_205336-Disclosures_and_Contributions.pdf [file 2018_205336-Disclosures_and_Contributions.pdf]

Haematologica  
HAEMATOL/2018/205336  
Version 4

Performance analysis of AL amyloidosis cardiac biomarker staging systems with special focus on renal failure and atrial arrhythmia

Tobias Dittrich, Axel Benner, Christoph Kimmich, Fabian aus dem Siepen, Kaya Veelken, Arnt V. Kristen, Tilmann Bochtler, Hugo A. Katus, Carsten Müller-Tidow, Ute Hegenbart, and Stefan O. Schönland

Disclosures: All authors declare no conflicts of interests.

Contributions: Conception and design: TD, UH, SOS Acquisition, analysis and interpretation of data: TD, AB, UH, SOS Writing the manuscript or revising it critically for important intellectual content: TD, AB, CK, FS, KV, AVK, TB, HAK, CMT, UH, SOS.
