# Supplementary material for: Performance analysis of AL amyloidosis cardiac biomarker staging systems with special focus on renal failure and atrial arrhythmia
Source: PubMed Central journal article supplement — Haematologica. 2019 Jan 17;104(7):1451–9. doi: 10.3324/haematol.2018.205336 (PMC6601086; doi:10.3324/haematol.2018.205336), 2019-07
Supplement: HAEMATOL-2018-205336v4-Dittrich-01.pdf [file HAEMATOL-2018-205336v4-Dittrich-01.pdf]

# A systematic comparison of the performance of the three widely used cardiac biomarker-based staging systems for the management of patients with systemic light chain amyloidosis

Retrospective study

1224 Patients with systemic light chain amyloidosis (AL) (Median age 63 years, 60% male)

Median estimated time of observation 45.5 months (95% CI, 41.7 to 50.8)

## STEP 1 Evaluation of the influence of two high-risk conditions on the applicability of the most widely staging systems (MAYO2004, MAYO3b and MAYO2012)

|                                                                                                                       | Overall survival (months)           |
|-----------------------------------------------------------------------------------------------------------------------|-------------------------------------|
| 415 Patients with impaired renal function $eGFR < 50 \text{ ml/min/1.73m}^2$<br>*Estimated glomerular filtration rate | 17.5 vs 52.9 (control) $p < 0.0001$ |
| 183 Patients with any kind of atrial arrhythmia (AF)                                                                  | 12.6 vs 45.5 (control) $p < 0.0001$ |

- Risk of death was almost doubled by either comorbidity
- MAYO3b staging system is superior to the MAYO2004 and MAYO2012 systems in patients with impaired kidney function

## STEP 2 Evaluation of additional prognostic value of $eGFR < 50$ and AF in the context of the three staging systems

### Multivariable analyses

|          | prognostic value of AF | prognostic value of $eGFR < 50$ |
|----------|------------------------|---------------------------------|
| MAYO2004 | significant            | significant                     |
| MAYO3b   | significant            | non significant                 |
| MAYO2012 | significant            | significant                     |

- $eGFR < 50$  did not retain the prognostic significance only with MAYO3b system

## STEP 3 Comparison of the overall performance of these staging systems

### Kaplan-Meier estimates

- MAYO3b system was superior in detecting the patients with the best and worst prognosis in the entire cohort and in each subgroup
